# Supplementary material for: Effects of UV Stress in Promoting Antioxidant Activities in Fungal Species Тrametes versicolor (L.) Lloyd and Flammulina velutipes (Curtis) Singer
Source: MDPI journal article supplement (doi:10.3390/antiox12020302), 2023-01-28
Supplement: s1 [file s1]

**Table S1.** Optimised dynamic MRM parameters.

| compound                      | Precursor<br><i>m/z</i> | Product<br><i>m/z</i> | <i>V</i> <sub>fragmentor</sub><br>(V) | <i>V</i> <sub>collision</sub><br>(V) | <i>t</i> <sub>R</sub><br>(min) |
|-------------------------------|-------------------------|-----------------------|---------------------------------------|--------------------------------------|--------------------------------|
| <i>p</i> -hydroxybenzoic acid | 137                     | 93                    | 80                                    | 10                                   | 2.18                           |
| cinamic acid                  | 147                     | 103                   | 100                                   | 5                                    | 10                             |
| protocatechuic acid           | 153                     | 109                   | 105                                   | 9                                    | 1.94                           |
| 2,5-dihydroxybenzoic acid     | 153                     | 109                   | 100                                   | 9                                    | 2.64                           |
| umbeliferon                   | 161                     | 133                   | 120                                   | 19                                   | 4.64                           |
| <i>p</i> -coumaric acid       | 163                     | 119                   | 90                                    | 9                                    | 5                              |
| <i>o</i> -coumaric acid       | 163                     | 119                   | 100                                   | 5                                    | 6.67                           |
| vanillic acid                 | 167                     | 108                   | 100                                   | 15                                   | 3.35                           |
| gallic acid                   | 169                     | 125                   | 90                                    | 10                                   | 1.36                           |
| esculetin                     | 177                     | 133                   | 105                                   | 15                                   | 2.99                           |
| caffeic acid                  | 179                     | 135                   | 100                                   | 10                                   | 3.18                           |
| quinic acid                   | 191                     | 85                    | 150                                   | 20                                   | 1.09                           |
| scopoletin                    | 191                     | 176                   | 80                                    | 8                                    | 3.28                           |
| ferulic acid                  | 193                     | 134                   | 90                                    | 11                                   | 3.59                           |
| siringic acid                 | 197                     | 182                   | 90                                    | 7                                    | 3.58                           |
| 3,4-dimethoxycinnamic acid    | 207                     | 103                   | 110                                   | 7                                    | 5.03                           |
| sinapinic acid                | 223                     | 193                   | 100                                   | 17                                   | 3.52                           |
| daidzein                      | 253                     | 208                   | 145                                   | 31                                   | 6.4                            |
| genistein                     | 269                     | 133                   | 145                                   | 32                                   | 7.69                           |
| apigenin                      | 269                     | 117                   | 130                                   | 25                                   | 8.65                           |
| baikalein                     | 269                     | 269                   | 165                                   | 0                                    | 10.1                           |
| naringenin                    | 271                     | 151                   | 130                                   | 16                                   | 7.2                            |
| luteolin                      | 285                     | 133                   | 135                                   | 25                                   | 7.45                           |
| kaempferol                    | 285                     | 285                   | 130                                   | 0                                    | 8                              |
| catechin                      | 289                     | 245                   | 150                                   | 10                                   | 1.91                           |
| epicatechin                   | 289                     | 245                   | 150                                   | 10                                   | 2.91                           |
| chryzoeriol                   | 299                     | 284                   | 125                                   | 20                                   | 8.96                           |
| quercetin                     | 301                     | 151                   | 130                                   | 15                                   | 9                              |
| isorhamnetin                  | 315                     | 300                   | 160                                   | 21                                   | 12.45                          |
| myricetin                     | 317                     | 179                   | 150                                   | 20                                   | 6.97                           |
| chlorogenic acid              | 353                     | 191                   | 100                                   | 10                                   | 2.32                           |
| matairesinol                  | 357                     | 122                   | 130                                   | 24                                   | 6.7                            |
| secoizolaricirezinol          | 361                     | 165                   | 130                                   | 26                                   | 5.29                           |
| vitexin                       | 431                     | 311                   | 200                                   | 22                                   | 3.53                           |
| apigenin-7- <i>O</i> -Glc     | 431                     | 268                   | 135                                   | 41                                   | 5.07                           |
| baicalin                      | 445                     | 269                   | 140                                   | 22                                   | 6.12                           |

|                             |     |     |     |    |      |
|-----------------------------|-----|-----|-----|----|------|
| luteolin-7- <i>O</i> -Glc   | 447 | 285 | 230 | 30 | 4.02 |
| quercitrin                  | 447 | 300 | 190 | 27 | 5.23 |
| kaempferol-3- <i>O</i> -Glc | 447 | 284 | 190 | 30 | 5.3  |
| epigallocatechin-gallate    | 457 | 169 | 165 | 16 | 2.47 |
| quercetin-3- <i>O</i> -Gal  | 463 | 300 | 200 | 30 | 4.08 |
| quercetin-3- <i>O</i> -Glc  | 463 | 300 | 210 | 30 | 4.23 |
| amentoflavon                | 537 | 375 | 220 | 35 | 15   |
| apigenin                    | 563 | 269 | 250 | 36 | 4.82 |
| rutin                       | 609 | 300 | 135 | 42 | 4.14 |
